1

2

3

4

## **A thermal radiator underlies plasticity to extreme**

5

## **temperatures in the world's largest bird**

6

7

8

9

Erik I. Svensson <sup>\*, a</sup>, Mads F. Schou <sup>\*, a</sup>, Julian Melgar <sup>a</sup>, John Waller <sup>b</sup>, Anel Engelbrecht <sup>c</sup>,

10

Zanell Brand <sup>c</sup>, Schalk Cloete <sup>c, d</sup> & Charlie K. Cornwallis <sup>a</sup>

11

12

<sup>a</sup> Department of Biology, Lund University, Lund, Sweden

13

<sup>b</sup> Global Biodiversity Information Facility (GBIF)

14

<sup>c</sup> Directorate Animal Sciences, Western Cape Department of Agriculture, South Africa

15

<sup>d</sup> Department of Animal Sciences, University of Stellenbosch, Matieland, South Africa

16

\* These authors contributed equally

17 **Abstract**

18 Organisms inhabiting extreme thermal environments, such as desert birds, have evolved various  
19 adaptations to thermoregulate during hot days and cold nights. However, our knowledge of  
20 selection acting on thermoregulatory traits and their evolutionary potential is limited,  
21 particularly for large organisms experiencing extreme temperature fluctuations. Here we show,  
22 using thermal imaging that the featherless neck of the ostrich (*Struthio camelus*) acts as a  
23 ‘thermal radiator’, protecting the head from overheating during hot conditions and conserving  
24 heat during cool conditions. We found substantial individual variation in thermal plasticity of  
25 the neck to dissipate heat away from the head that was associated with increased egg-laying  
26 rates during high ambient temperatures. Combined with low, but significant, heritability  
27 estimates of individual thermal profiles, these findings suggest that the ostrich neck functions  
28 as an adaptive thermal radiator with evolutionary potential. There were also signatures of past  
29 selection, since ostriches originating from more volatile climatic regions and females that  
30 incubate during hot daytime conditions exhibited especially high thermal plasticity. Taken  
31 together our results indicate that morphological adaptations involved in ostrich  
32 thermoregulation, such as the neck, are experiencing ongoing selection and are crucial for  
33 successfully reproducing under fluctuating climatic conditions.

## 34 **Introduction**

35 Organisms need to manage heat and cold stress to survive and reproduce in variable  
36 environments<sup>1</sup>. The universal challenge of coping with thermal stress<sup>2-5</sup> has promoted the  
37 evolution of morphological adaptations that regulate temperature<sup>6-8</sup>. For example, the ears of  
38 the elephant (*Loxodonta africana*)<sup>9</sup>, the extended bill of the Toco Toucan (*Ramphastos*  
39 *toco*)<sup>10,11</sup> and the featherless head patches of the Zebra Finch (*Taeniopygia guttata*)<sup>12</sup> all  
40 function to reduce thermal stress. These structures effectively work as ‘thermal radiators’<sup>12,13</sup>,  
41 emitting excess heat to the surrounding environment during hot conditions and reducing heat  
42 loss during cold conditions<sup>13</sup>. However, whether such thermal radiators vary among individuals,  
43 are heritable and are targets of selection is unclear. Consequently, our understanding of the  
44 ecological and evolutionary processes shaping such thermal adaptations is limited<sup>3</sup>.

45  
46 The evolutionary capacity of populations to cope with short-term thermal stressors, such as  
47 heatwaves, requires genetic variance in thermoregulatory traits<sup>2,5,14</sup>. Yet empirical findings  
48 suggest that genetic variation in thermal and climatic adaptations is often low<sup>15,16</sup>. Body  
49 temperatures and thermal adaptations are also often strongly phylogenetically conserved<sup>17,18</sup>  
50 and seem to evolve slowly compared to other traits<sup>19</sup>. Williams<sup>20</sup> even questioned if  
51 endothermic body temperatures could evolve, suggesting there will be evolutionary stasis in  
52 thermal adaptations. The challenges associated with quantifying genetic variance in  
53 thermoregulatory traits have hindered progress in assessing whether thermal adaptations can  
54 evolve at a sufficient pace to keep up with climate change. This has, in turn, made it difficult to  
55 assess the possible elevated extinction risks caused by increasing temperatures<sup>21-25</sup>.

56  
57 An important factor influencing selection for thermoregulation is body size. Large bodies can  
58 cause higher thermal inertia, and a slower rate of body temperature change, compared to small

59 bodies<sup>1,26</sup>. Thermal inertia can help maintain body temperatures during cold conditions, but can  
60 jeopardise survival and reproduction when extreme temperatures cause heat stress<sup>2,4,5,14,23,27</sup>.  
61 Large animals might be particularly vulnerable to rapid changes in climatic conditions as their  
62 rate of adaptation is predicted to be lower due to their longer generation times and lower  
63 population sizes<sup>24,25</sup>. Understanding how large-bodied animals cope with thermal stress in  
64 fluctuating and stressful thermal environments therefore requires particular attention.

65

66 Here we study thermoregulation and thermal plasticity in the largest surviving bird species in  
67 the world: the flightless ostrich (*Struthio camelus*) (Fig. 1). We have recently shown that there  
68 is heritable variation in thermal tolerance, and that both heat and cold stress reduce reproductive  
69 success in female ostriches<sup>4,27</sup>. However, the specific phenotypic adaptations that underlie these  
70 differences in reproductive thermal tolerance are unknown, as well as the possible role of  
71 thermal plasticity and genetic variation in plasticity. To link individual variation in  
72 thermoregulation with reproductive success, we combined a large-scale thermal imaging  
73 dataset ( $n_{\text{images}}=5531$ ,  $n_{\text{individuals}}=794$ ) with daily weather records and measures of individual  
74 reproductive success in the Klein Karoo, South Africa. This hot and dry area shows some of  
75 the highest fluctuations in temperature in Africa and on Earth, with ambient temperatures  
76 ranging from  $-5$  to  $45^{\circ}\text{C}$ <sup>4</sup>. Additive genetic variance in thermoregulation was estimated using a  
77 nine-generation pedigree. With this data we examined: 1) if there are morphological features  
78 that act as thermal radiators that enable heat to be dissipated when hot and conserved when  
79 cold; 2) how variation in the efficiency of thermal radiators influence reproductive success,  
80 measured as egg-laying rates; 3) levels of genetic variation in thermal radiators within  
81 populations, and 4) if the efficiency of thermal radiators differs between populations from  
82 environments which have experienced different levels of past climatic fluctuations during their  
83 evolutionary history.

84

## 85 **Results**

### 86 **The neck as a thermal radiator**

87 We found evidence for extensive thermal plasticity in both the head and neck, with surface  
88 temperatures (T) rising with air temperatures ( $T_{\text{Head}}$  (credible interval, CI) = 10.1 (9.1, 11.0),  
89  $p\text{MCMC} = 0.001$ ; slope  $T_{\text{Neck}}$  (CI) = 12.3 (11.2, 13.4),  $p\text{MCMC} = 0.001$ ; Fig. 2A; Tables S1-  
90 S2) and declining as air temperatures decreased ( $T_{\text{Head}}$  (CI) = -6.1 (-7.8, -4.3),  $p\text{MCMC} = 0.001$ ;  
91  $T_{\text{Neck}}$  (CI) = -6.3 (-8.4, -4.4),  $p\text{MCMC} = 0.001$ ; Fig. 2B; Tables S1-S2). The neck exhibited  
92 significantly more thermal plasticity (a steeper slope) compared to the head (Increasing air  $T_{\text{Neck}}$   
93 vs Increasing air  $T_{\text{Head}}$  (CI) = 1.5 (1.3, 1.8),  $p\text{MCMC} = 0.001$ ; Decreasing air  $T_{\text{Neck}}$  vs  
94 Decreasing air  $T_{\text{Head}}$  (CI) = -2.2 (-2.9, -1.4),  $p\text{MCMC} = 0.001$ , Fig. 2C; Table S3). The greater  
95 thermal plasticity of the neck suggests that it may function as a thermal radiator to get rid of  
96 excess heat to protect the head and brain. This was supported by neck and head differences  
97 being small at benign temperatures (air temperatures  $> 20^{\circ}\text{C}$  &  $< 30^{\circ}\text{C}$ ), where the need for  
98 thermoregulation is reduced, but large at low (air temperatures  $\leq 20^{\circ}\text{C}$ ) and high temperatures  
99 (air temperatures  $\geq 30^{\circ}\text{C}$ ) (Fig. 2D).

100

101 The amount of thermal plasticity differed between males and females (Figs. 1, 2C). Males were  
102 less plastic than females, with a slower increase in neck surface temperature at high  
103 temperatures (Males vs females<sub>Neck</sub> (CI) = -1.5 (-2.0, -0.9),  $p\text{MCMC} = 0.001$ ; Fig. 2C; Table  
104 S2; Table S1 for similar results for the head). This result was not due to body mass differences  
105 between males and females (Table S5; Fig. S1-S2, Table S4 for similar results for the head),  
106 making it unlikely that sex differences in thermal plasticity are explained by the larger males  
107 having more thermal inertia.

108

## 109 **The importance of the thermal radiator for reproduction**

110 To test if the neck is functionally important as a thermal radiator, we quantified its efficiency  
111 in regulating head temperature, measured by the individual temperature difference between the  
112 neck and the head (neck-head temperature). We found that neck-head temperature was  
113 significantly related to egg-laying rates (Fig. 3A). This buffering effect of the neck temperature  
114 on head temperature was positively related to female egg-laying rates when hot, but not when  
115 benign ( $\text{Hot}_{\text{Neck-Head}}$  (CI) = 0.16 (0.01, 0.31); pMCMC = 0.039; Fig. 3A; Table S7).

116  
117 Neck-head temperature differences also increased significantly when females incubated during  
118 hot afternoons, but not cold mornings (Fig. 3B-C). Furthermore, the neck showed a stronger  
119 plastic response compared to the head when females were incubating during the hot afternoons  
120 (paired t-test:  $t_{1,11} = 2.3$ ,  $P = 0.041$ ). Monitoring the thermal profile of an incubating female  
121 further illustrated that thermal stress increased as incubation progressed (Fig. 3D-E). After 35  
122 minutes, the female halted incubation, moved into shade, and opened her wings. This reduced  
123 her surface temperature to the level of non-incubating (standing) females (Fig. 3D). These  
124 results suggest that head temperature regulation, via heat dissipation from the neck, has benefits  
125 for female egg production as well as for their ability to successfully incubate these eggs (Fig.  
126 3A; Table S7). The differences in thermal plasticity between the sexes may therefore reflect  
127 sex-specific adaptations to their different reproductive roles: whereas females incubate during  
128 the hot hours of the day, males primarily incubate during the night<sup>28</sup>.

129

## 130 **Quantitative genetics and the heritability of thermal radiator efficiency**

131 When investigating the potential for the neck as a thermal radiator to evolve, we found that the  
132 repeatability of the neck-head temperature among individuals ranged from 0.09 to 0.15 at cold,  
133 benign and hot temperatures (Fig. 4, Table S8). Repeatability is expected to be relatively low  
134 as thermal profiles can be influenced by many factors, such as air temperature, microhabitat

135 and activity prior to measurement (Figs. 1-2). Nevertheless, heritability estimates were  
136 significant, ranging from 0.04 to 0.06, in the neck-head temperature (Fig. 4, Table S8, see also  
137 Table S9-S10 for separate models of head and neck). These heritability estimates are low,  
138 suggestive of limited evolutionary potential, but it should be noted that they are capped by low  
139 repeatabilities. With our current data it is difficult to know the exact magnitude of these  
140 heritabilities, other than that they are significantly greater than zero.

141

142 Further support for a genetic basis of the neck as thermal radiator was evident from a significant  
143 negative genetic correlation ( $r_g$ ) between the intercept (at 20°C) and the slope of the thermal  
144 reaction norms to increasing temperatures ( $r_g$  (CI) = -0.60 (-0.79, -0.27); Table S11).  
145 Individuals that under benign conditions (low intercept at 20°C) had relatively little heat loss  
146 through their neck compared to their head, emitted more heat through their necks as  
147 temperatures increased (steeper positive slopes). In contrast, individuals with a relatively high  
148 neck heat loss at benign temperatures (high intercepts at 20°C) exhibited little change with  
149 increasing temperatures (shallower slopes  $\sim 0$ . Fig. S4).

150

### 151 **Thermal plasticity differs between populations from different climatic regions**

152 We compared the efficiency of the neck at regulating head temperatures across three different  
153 ostrich populations, all kept at the study site in South Africa (Fig. 5). These populations, South  
154 African Blacks (SAB: *Struthio camelus*), Zimbabwean Blues (ZB: *S. c. australis*) and Kenyan  
155 Reds (KR: *S. c. massaicus*) differ in their geographic origin and evolved under different climatic  
156 regimes (Fig. 5A-B). East African regions, where the KR naturally occurs, is less seasonal,  
157 exhibiting lower fluctuations in temperature and precipitation, than the regions where ZB and  
158 SAB populations occur (Fig. 5B). Ostriches from these populations also differed in

159 morphology, particularly size and shape (Fig. 5C-D, Tables S12-S13), with KR and ZB having  
160 longer necks than SAB (Fig. 5C-D).

161  
162 We investigated whether variation in morphology and climatic conditions across populations  
163 corresponded to differences in the thermoregulatory properties of the neck. Morphological  
164 differences between the three populations did not explain variation in neck and head thermal  
165 plasticity. There were nonetheless pronounced differences between populations in plasticity  
166 that matched with the climatic stability of the environments they originated from. The KR, that  
167 occurs in more stable natural environments, displayed little plasticity, i.e. showed a constant  
168 neck-head temperature when temperatures increased from benign to hot (Fig. 5E). This was not  
169 the case for the SAB and ZB that originated from the more seasonal environments of southern  
170 Africa. They showed higher thermal plasticity, with the neck-head temperature increasing from  
171 benign to hot (Fig. 5E). This suggests that the population differences in adjustments in the neck  
172 to stabilize head temperatures have been shaped by past and current climatic conditions in  
173 different regions across Africa.

174

## 175 **Discussion**

176 This study shows that the ostrich neck functions as a thermal radiator, dissipating heat away  
177 from the head under high temperatures and reducing heat loss under cooler conditions (Fig. 2).  
178 The efficiency of this thermal radiator appears to have a genetic basis and promotes  
179 reproduction under a greater range of temperatures (Fig. 3-4). Ostriches from populations that  
180 experience greater temperature changes were also more efficient at dissipating heat through  
181 their necks. These results suggest that the ostrich neck is an efficient thermal radiator with the  
182 potential for further adaptation that appears to have partly evolved in response to fluctuating  
183 climates (Figs. 4-5).



184

185 Previous mechanistic studies have identified various morphological structures as potential  
186 thermal radiators, including bare skin patches<sup>12</sup> and external appendages, such as the ears of  
187 elephants<sup>9</sup>, the enlarged claws of fiddler crabs<sup>29</sup> and the beaks of birds<sup>10,11,30</sup>. In addition,  
188 secondary sexual signaling characters involving melanin or structural iridescent colors can also  
189 have cascading effects on body temperature, and be either beneficial in cold environments or  
190 to decrease risk of overheating in hot environments<sup>31–33</sup>. While these previous mechanistic  
191 studies have provided compelling evidence for the thermoregulatory consequences of various  
192 morphological traits, they have not provided direct evidence for their fitness consequences,  
193 plasticity, and underlying genetic variation. In this study, the results of sex differences (Fig. 2),  
194 population differences (Fig. 5) and significant additive genetic variance in thermal plasticity  
195 (Fig. 4) jointly suggest that past and present climatic conditions have shaped the evolution of  
196 the ostrich neck as a thermal radiator.

197

198 The low estimates of heritability we found raises the question if further evolutionary responses  
199 to selection for thermal plasticity are possible. Previous studies of thermal adaptation across  
200 different organisms have also shown heritability to be low, suggesting that the genetic basis of  
201 thermal plasticity may just be difficult to quantify<sup>15,16</sup>. Alternatively, it may be that thermal  
202 plasticity is nonadaptive or maladaptive, a contention supported by recent empirical research<sup>34–  
203 37</sup>. For example, plasticity in both core body temperature, and the temperatures of external body  
204 parts can be maladaptive in both ectotherms, like insects<sup>34</sup> and reptiles<sup>38</sup>, and endotherms, like  
205 birds<sup>39</sup>. Such maladaptive thermal plasticity may result from the costs of maintaining  
206 homeostasis and stable body temperatures under thermally stressful conditions, leading to  
207 selection for reduced plasticity and increased thermal canalization<sup>34,38</sup>.

208

209 We found that ostriches that experienced the lowest heat loss from the neck at benign  
210 temperatures also had the greatest plastic responses to increasing temperatures. This was  
211 mirrored by a negative genetic correlation between the slope and the intercept of the thermal  
212 reaction norm, revealing that there is additive genetic variation for thermoregulation via the  
213 neck, i.e. the presence of genetic variation in thermal plasticity. One interpretation of this result  
214 is that individuals operating at their maximum thermoregulatory capacity under benign  
215 temperatures have reduced scope for heat dissipation as temperatures increase. This negative  
216 genetic correlation is also consistent with a trade-off between the thermal slope and intercept,  
217 that is, the ability to buffer against heat stress might conflict with the ability to warm up during  
218 cold conditions. Such trade-offs have been discussed for a long time in the thermal adaptation  
219 literature, but there is little previous empirical evidence for their existence in endotherms<sup>40-43</sup>.  
220 Alternatively, the negative relationship between slope and intercept may simply reflect that the  
221 expression of additive genetic variance is higher at benign conditions compared to hot  
222 conditions.

223  
224 Our findings raise general questions about the evolutionary origins of novel thermoregulatory  
225 traits beyond the ostrich neck. In particular, has the neck of the ostrich evolved to be long to  
226 cope with thermal stress, or is it an example of a so-called "exaptation"<sup>44</sup>, where a pre-existing  
227 trait became co-opted for a new purpose? The bills of birds<sup>10,11,30</sup> and sexual signaling traits  
228 such as coloration in various invertebrates<sup>29,31,32,34</sup> can also influence thermoregulation, and  
229 illustrate how traits with originally non-thermal functions can subsequently be modified and  
230 maintained by selection pressures that differ from those that drove original spread of the traits<sup>45</sup>.  
231 A classic example of a putative exaptation is the long neck of the giraffe (*Giraffa*  
232 *camelopardalis*), where the original explanation by Darwin was that the neck became extended  
233 because of natural selection for foraging efficiency, fueled by interspecific competition<sup>46</sup>. Later

234 work questioned this evolutionary origin by revealing that the neck is also important in male-  
235 male competition over access to females<sup>46</sup>. In the case of the ostrich, its long neck probably  
236 serves multiple functions, including foraging, vigilance and amplification of male mating  
237 sounds<sup>28,47</sup> but currently it also functions in thermoregulation. There are signs that other such  
238 co-opted thermoregulatory traits are currently rapidly evolving, due to the increasing  
239 temperatures of recent and ongoing climate change, consistent with "Allen's Rule"<sup>30</sup>.  
240 Specifically, the relative length of appendices and bird beaks that function as thermal radiators  
241 have increased during recent decades<sup>30</sup>. Given these recent trends in other animals, it is possible  
242 that the neck length of the ostrich will increase in the future to improve the ability to get rid of  
243 excess heat.

244

245 Decades of avian research in the temperate zone has focused on food availability in altricial  
246 birds as a major limiting factor for reproduction<sup>48,49</sup>. However, for precocial birds inhabiting  
247 tropical and subtropical areas, like the ostrich, temperature stress during reproduction might  
248 pose a more severe challenge than food limitation<sup>14</sup>. Morphological traits can maintain non-  
249 lethal body temperatures<sup>10-13,29,50</sup>, but linking such traits to reproductive success and  
250 quantifying their evolutionary potential has proven to be difficult. Recent research from several  
251 taxa suggest that climate-mediated local extinctions might already be common<sup>21,22</sup>, with signs  
252 of collapse of some desert bird communities being documented<sup>51</sup>. Whether genetic variation in  
253 adaptations underlying thermal plasticity, such as the ostrich neck, are sufficient to enable rapid  
254 and large evolutionary responses to increasingly hot and fluctuating conditions remains an open  
255 question. While challenging, combining analyses of the genetics of thermal tolerance with long-  
256 term population monitoring of reproduction and survival is key to forecasting the potential  
257 damage caused by climate change, especially for vulnerable species such as large, tropical  
258 endotherms like the ostrich.

259

## 260 **Methods**

### 261 **1. Study site and study populations**

262 The study was conducted at the Oudtshoorn Research Farm in the arid Klein Karoo region of  
263 South Africa (GPS: 33° 38' 21.5"S, 22° 15' 17.4"E). Fenced enclosures (N=181) were used to  
264 monitor the reproductive success of ostriches that included 156 (~0.25 ha) for male-female pairs  
265 <sup>52</sup>, 11 for solitary males (0.03 ha) and 22 for groups (~0.47 ha). All individuals had access to  
266 *ad libitum* food and water. The ostrich individuals in this study belong to three different  
267 subspecies, hereafter referred to as populations: 1) the Masai ostrich (*Struthio camelus*  
268 *massaicus*), sometimes referred to as the Kenyan Red (KR), 2) the Southern African ostrich,  
269 (*S. c. australis*), sometimes referred to as the Zimbabwean Blue (ZB) because of its origin in  
270 Namibia and Zimbabwe, and 3) the South African Blacks (SAB), that is thought to be of mixed  
271 origin, but is genetically very similar to ZB (Davies et al 2012; unpublished data). SAB are also  
272 referred to as *S. c. var. domesticus*. Individuals that had less than 85% expected relatedness to  
273 one population, as determined by the pedigree (see below), were considered hybrids. Breeding  
274 birds were recruited from surviving chicks from previous years, and parentage data were used  
275 to compile a 9-generation pedigree with 139 founding individuals. Ethical clearance was  
276 obtained from the Western Cape Department of Agriculture (DECRA R12/48).

277

### 278 **2. Thermal imaging data**

279 From 2012 to 2018 we took thermal images of ostriches in the enclosures using an infrared  
280 thermography camera (H2640, NEC Avio Infrared Technologies). Pictures were usually taken  
281 from distances between 2m and 25m. We used the software InfRec Analyzer to draw separate  
282 polygons within the head and neck of the ostrich in each image, and the average temperature of  
283 these polygons were extracted as individual head and neck surface temperatures, respectively.

284 We used the same procedures and same default settings of the software as in our previous work,  
285 assuming an emissivity of 1<sup>31,34</sup>. As a measure of ambient temperature, we used estimates of  
286 hourly temperatures from a weather station positioned 600 m from the field site. We fitted a  
287 cubic spline to the hourly temperature estimates of each day using the R-package *mgcv* v.1.8<sup>53</sup>,  
288 from which we extracted the predicted ambient temperature at the time-points when thermal  
289 images were taken.

290

### 291 **3. Datasets and analyses**

#### 292 *3.1) Quantifying thermal plasticity of head and neck surface temperatures*

293 From 2012 to 2017, we took 5586 pictures of 794 individuals from early morning till late  
294 afternoon, giving on average of seven pictures per individual. This dataset was designed with  
295 the aim of having a high number of individuals with repeated sampling within and across years,  
296 such that each individual was monitored in different thermal environments, but with little  
297 repeated sampling within days (8% of the pictures).

298

299 With this dataset we modelled the thermal plasticity in surface temperatures of the head and  
300 neck in response to air temperature using generalized linear mixed models (GLMMs). A  
301 previous investigation showed reproductive success of ostriches is highest at a daily maximum  
302 temperature of ~20°C<sup>54</sup>. We therefore defined 20°C as the optimum temperature for ostriches,  
303 and calculated absolute *temperature change* away from this optimum, defining the factor  
304 *direction* to denote whether the change in temperature was due to a decrease or increase from  
305 the optimum. To make the intercept of statistical models represent the most benign temperature,  
306 we set 20°C to 0 and calculated deviations above (increases) and below (decreases) this value.  
307 The variance of slopes (see below) depends on the scale of the environmental parameter, and  
308 we therefore standardized our data by dividing it by the maximum of the temperature range,

309 resulting in 1 being the maximum temperature change. Head and neck temperatures were  
310 modeled as Gaussian traits in separate models. Models included the fixed effects of temperature  
311 change (ranging from 0 to 1) and direction (decreases or increases). The interaction between  
312 temperature change and direction was modelled with a common intercept for decreases and  
313 increases, as the way temperature change was calculated dictated that the intercepts were  
314 identical. We included the fixed effects of population (SAB, ZB, KR or hybrids), sex (male or  
315 female) and both the linear and quadratic terms of time of day (scaled and centered to a mean  
316 of zero and unit variance). We included interactions between population, temperature change  
317 and direction, as well as between sex, temperature change and direction.

318

319 We accounted for environmental effects that varied across years, such as diet, by including year  
320 as a random effect. Photographs were taken across 48 days, and we therefore included date as  
321 a random effect. We also added enclosure as a random effect as the enclosures varied in  
322 vegetation cover, potentially impacting on the local climatic conditions, and were repeatedly  
323 used across years. Temperature change and direction were interacted with individual ID, to  
324 allow independent rates of change in surface temperature of each individual. This was modelled  
325 as a 3x3 unstructured variance-covariance matrix.

326

327 GLMMs were run in R v.3.6.0<sup>55</sup> using the Bayesian framework implemented in the R-package  
328 MCMCglmm v.2.29<sup>56</sup>. For random terms we used the weakly informative inverse-Gamma  
329 distribution (scale = 0.001, shape = 0.001, i.e.  $V = \text{diag}(n)$ ,  $\nu = n-1+0.002$ , with  $n$  being the  
330 *dimension of the matrix*) as priors. Each model was run for 5,100,000 iterations of which the  
331 initial 100,000 were discarded and only every 4,000th iteration was used for estimating  
332 posterior probabilities. The number of iterations was based on inspection of autocorrelation  
333 among posterior samples in preliminary runs. Convergence of the estimates was checked by

334 running the model three times and inspecting the overlap of estimates in trace plots and the  
335 level of autocorrelation among posterior samples. Posterior mode and 95% credible intervals  
336 are reported for random effects.

337

### 338 *3.2) Determining the impact of body mass on thermal plasticity*

339 To test if differences in thermal plasticity were caused by differences in body mass, we ran a  
340 separate set of models including individual body mass as an additional fixed effect. We had  
341 records of body mass for 792 individuals and when multiple records were available for one  
342 individual we used the record closest to the time of the thermal image. Models for surface  
343 temperature of the head and neck were implemented using the model structure described in  
344 **Methods 3.1**, but with body mass (scaled and centered to a mean of zero and unit variance)  
345 interacted with all the previously described fixed effects.

346

### 347 *3.3) Comparing thermal plasticity of the neck with the head*

348 We compared the level of thermal plasticity in surface temperatures between the neck and head.  
349 This was done by running a model that included body part (neck or head) as a fixed effect. The  
350 models were implemented using the model structure described in **Methods 3.1**, but with body  
351 part interacted with all the previously described fixed effects. We also added image as an  
352 additional random effect because head and neck surface temperatures were derived as pairs  
353 from the same image.

354

### 355 *3.4) Investigating the neck as a thermal window*

356 Results from previous analyses (**methods 3.1**) indicated that the neck functions as a thermal  
357 window emitting excess heat during hot periods and conserved heat during cold periods. To  
358 investigate this further, we defined the efficiency of the thermal window as the difference

359 between neck and head surface temperatures. Positive values therefore indicated that the neck  
360 was warmer than the head and negative values when the head was warmer than the neck. To  
361 test if the neck-head temperature at high air temperatures differs from benign and cold air  
362 temperatures, we grouped air temperature into three categories: Cold (air temperatures  $\leq 20^{\circ}\text{C}$ ,  
363  $n_{\text{images}} = 1683$ ), Benign (air temperatures  $> 20^{\circ}\text{C}$  &  $< 30^{\circ}\text{C}$ ,  $n_{\text{images}} = 2152$ ) and Hot (air  
364 temperatures  $\geq 30^{\circ}\text{C}$ ,  $n_{\text{images}} = 1696$ ). The grouping of air temperature into these three  
365 categories was based on the thermal neutral zone of the emu<sup>57</sup>, and to ensure roughly equal  
366 replication within the cold and hot categories. These categories do not capture the effects of  
367 small deviations in air temperature, and we therefore added a continuous measure of the  
368 deviation from the mean ambient air temperature in each category. This variable was  
369 constructed by centering and scaling the air temperature records within each air temperature  
370 category. We modelled the response of the neck-head temperature (Gaussian) to air temperature  
371 category by following the same general approach in **Methods 3.1**. The major difference was  
372 that air temperature category was included as a fixed factor (instead of air temperature change  
373 and direction) and interacted with female ID to generate a 3x3 unstructured variance-covariance  
374 matrix composed of the cold, benign and hot temperature categories. We also estimated the  
375 residual variance separately for each air temperature category.

376

### 377 *3.5) Effect of neck and head surface temperatures on reproductive success*

378 To test if the efficiency of the neck as a thermal window influences reproductive success we  
379 analyzed its relationship with rates of egg-laying. We connected thermal measurements of  
380 individual females to their egg-laying records. From previous investigations we know that when  
381 daily maximum temperature exceeds  $20^{\circ}\text{C}$  ostrich egg laying-rate starts to slowly decrease two  
382 to four days later, possibly because this is the time it takes for the egg to travel down the  
383 oviduct<sup>54</sup>. We therefore monitored whether any eggs were laid two to four days after females



384 were thermal imaged at days reaching more than 20°C. If females with higher neck- than head  
385 surface temperatures have a higher probability of laying an egg during this time window, this  
386 would indicate that the thermoregulatory capacity of the neck is indeed important for  
387 reproductive success. We are, however, careful with inferring causation, as it is possible that a  
388 third confounding factor, such as metabolic rate, may generate an autocorrelation between heat  
389 emitted via the neck and laying rates. To overcome this, we grouped the data into photographs  
390 taken during hot and benign times of the days (**methods 3.4**). If an elevated neck to head  
391 temperature ratio reflects increased tolerance to heat, then its positive relationship with egg-  
392 laying should be most pronounced when hot.

393

394 Egg laying rates were analysed using the model structure described in **Methods 3.1**, but with  
395 the following modifications: a) the probability of laying (binary, model type: “threshold”) was  
396 used as the response variable, b) the fixed effects included were neck-head temperature  
397 difference (scaled and centered to a mean of zero and unit variance), ambient air temperature  
398 category (hot or benign), and population (KR, SAB, ZB or Hybrid), as well as the interaction  
399 between neck-head temperature and temperature category, c) as females of two years of age lay  
400 fewer eggs than older females<sup>54</sup>, a factor of age (2 versus >2) was also included as a fixed  
401 effect, and d) year, date, enclosure and individual ID were included as random effects. The first  
402 45 days of the breeding season were removed as this is the average time it takes for pairs to  
403 acclimate to each other and their enclosure<sup>54</sup>. We also removed females that laid fewer than ten  
404 eggs per year to avoid including females from incompatible pairs, and individuals that did not  
405 enter the breeding state. Each model was run for 31,500,000 iterations of which the initial  
406 1,500,000 were discarded and only every 10,000th iteration was used for estimating posterior  
407 probabilities.

408

409 *3.6 Thermoregulation during incubation*

410 In 2017, we obtained thermal images of six females incubating in the morning (<12.00 am)  
411 when air temperatures are typically lower, and of 11 individuals incubating in the afternoon  
412 (>12.00 am) when the air temperatures were substantially higher. To test if their surface  
413 temperatures increased during incubation during each of these two time periods, we used paired  
414 t-tests to compare the surface temperatures of each of these individuals with the mean surface  
415 temperatures of two standing individuals, one photographed shortly before and one  
416 photographed shortly after the sitting individual. Tests were done separately for the surface  
417 temperatures of the head and neck. One of the incubating individuals was photographed twice  
418 in sequence and we therefore used the mean surface temperatures of the two observations. In  
419 three cases, two incubating individuals were paired with the same standing individuals and  
420 instead of using the mean surface temperatures of two standing individuals, each incubating  
421 individual was paired to the closest standing individual. We also tested if the temperature  
422 differences between incubating and standing individuals were more pronounced in either the  
423 head or neck than in the other. For this we used paired *t*-tests to compare temperature differences  
424 of the head with temperature differences of the neck. Finally, we closely monitored the change  
425 in surface temperature for one female during prolonged incubation sessions when she was  
426 standing after incubating. Eighteen pictures of this female were taken over 82 minutes, each  
427 followed by at least one picture of another standing individual to create a background reference  
428 image for comparison. Due to the nature of this dataset, we did not perform any statistical  
429 analyses, but present the data as an observation of the dynamics of thermoregulation during  
430 incubation.

431

432 *3.7) Quantifying the evolutionary potential of thermal plasticity*

433 Using the model of the change in neck-head temperature in each air temperature category  
434 (**methods 3.4**), we estimated the repeatability (R) of the neck-head temperature under different  
435 temperature conditions. This was done using the estimates of permanent individual variances  
436 ( $pe$ ) estimated in the variance-covariance matrix of individual ID by air temperature category:

$$437 \quad (1) R = \frac{\sigma^2_{pe}}{\sigma^2_{pe} + \sigma^2_{year} + \sigma^2_{enclosure} + \sigma^2_{res}}.$$

438 The individual variance and covariance in neck-head temperatures may originate from both  
439 environmental and genetic factors. To partition the among-individual variance that is due to  
440 additive genetic effects we added a second 3x3 unstructured variance-covariance matrix of  
441 individual ID linked to the pedigree ( $a$ ). With these variance components, we estimated the  
442 narrow sense heritability ( $h^2$ ) of the neck-head temperature in each air temperature category as  
443 the proportion of phenotypic variance attributable to additive genetic variance:

$$444 \quad (2) h^2 = \frac{\sigma^2_a}{\sigma^2_{pe} + \sigma^2_a + \sigma^2_{year} + \sigma^2_{camp} + \sigma^2_{res}}$$

445 We also estimated evolvability ( $I_A$ )<sup>58</sup>:

$$446 \quad (3) I_A = \frac{\sigma^2_a}{\text{trait mean}^2} * 100$$

447 One characteristic of evolvability is that it increases vary fast as trait mean approaches zero.  
448 When we initially used the posterior of the trait mean to estimate evolvability, this caused near  
449 infinity estimates of evolvability for some of the samples in the posterior, causing biased  
450 estimates of the posterior mode and mean of evolvability. To avoid this, we used the posterior  
451 mode of trait mean in the denominator, such that only the uncertainty of additive genetic  
452 variance is included in the reported estimate of evolvability. We also ran identical models with  
453 head or neck surface temperature as the response variable. The outcome of these analyses is  
454 available in the supplementary materials (**Tables S9-S10**).

455

456 Finally, we modelled neck-head temperature in a random regression model, using the model  
457 structure described in **methods 3.1**. This approach was taken to investigate if the neck-head  
458 temperature at the optimum temperature (the intercept) influences the rate of change in neck-  
459 head temperatures as air temperatures increase or decrease (the slopes). To test if such a  
460 relationship is driven by different families, we added a second 3x3 unstructured variance-  
461 covariance matrix of individual ID linked to the pedigree and interacted with temperature  
462 change and direction. The genetic variance and co-variance was then used to estimate the  
463 genetic correlation between the slopes and intercepts ( $\text{correlation} = \text{covariance}_{\text{trait1,trait2}} /$   
464  $\text{sqrt}(\text{var}_{\text{trait1}} * \text{var}_{\text{trait2}})$ ) (**Table S11**).

465

### 466 3.8) Current distribution and morphology of ostrich populations

467 We obtained estimates of current distributions of *S. c. massaicus* (KR) and *S. c. australis* (ZB).  
468 This was done by downloading region-based presence/absence data from Avibase  
469 (<https://avibase.bsc-eoc.org>, September, 2020) and plotting these using the R-package  
470 “rnaturalearth” v. 0.1.0. To identify climatic differences in their distributions we downloaded  
471 19 bioclimatic variables (10min) from WorldClim v. 2<sup>59</sup>. We performed a Principal Component  
472 Analyses (PCA) and inspected the loadings of the first four principal components after varimax  
473 transformation (**Table S14**). Based on this inspection we described each principal component  
474 by one or two bioclimatic variables to characterize climatic differences.

475

476 We estimated population differences in neck morphology between SAB ( $n_{\text{individuals}} = 23$ ), ZB  
477 ( $n_{\text{individuals}} = 16$ ) and KR ( $n_{\text{individuals}} = 21$ ) by measuring height and neck length. Neck length was  
478 measured from from the cranium to the point where the neck enters the body. Height was  
479 measured as the distance from the ground to the cranium. We modelled neck length as a  
480 Gaussian response variable in a linear model including population (SAB, KR or ZB), sex (male

481 or female) and height (centred and scaled) as fixed effects. We also included the interaction  
482 between height and sex and between height and population. The model was run in MCMCglmm  
483 v.2.2 for 31,500,000 iterations of which the initial 1,500,000 were discarded and only every  
484 10,000th iteration was used for estimating posterior probabilities. Model diagnostics were  
485 performed as described in **methods 3.1**. To examine population differences in the relative neck  
486 length we ran an identical model with neck length/height as Gaussian response variable. In this  
487 model height was not included as a fixed effect.

488

### 489 **Acknowledgements**

490 We thank the staff and workers at Oudtshoorn Research Farm for assistance with data collection  
491 and maintenance of the birds and the Western Cape Government for use of their resources. We  
492 also thank members of “Svensson Lab” (students and assistants) who helped with analyzing the  
493 thermal images. The computations were performed on resources provided by SNIC through  
494 Uppsala Multidisciplinary Center for Advanced Computational Science (UPPMAX) under  
495 Project SNIC 2018/8-359.

496

### 497 **Funding:**

498 Carlsberg Foundation (MFS)

499 Swedish Research Council grant 2017-03880 (CKC)

500 Knut and Alice Wallenberg Foundation grant 2018.0138 (CKC)

501 Carl Tryggers grant 12: 92 & 19: 71 (CKC)

502 Carl Tryggers grant 19: 71 (CKC)

503 Swedish Research Council grant 2016-03356 (EIS)

504 Western Cape Agricultural Research Trust grant 0070/000VOLSTRUISE (SC)

505 Technology and Human Resources for Industry program of the South African National  
506 Research Foundation grant TP14081390585) (SC)

507

## 508 **Author Contributions**

509 Conceptualization: E.I.S, C.K.S., M.F.S.

510 Data curation: E.I.S., C.K.C., M.F.S., A.E., Z.B., S.C.

511 Formal analysis: M.F.S.

512 Funding acquisition: C.K.C, E.I.S., M.F.S, S.C.

513 Investigation: E.I.S., C.K.C., J.M., J.W., M.F.S., S.C., Z.B

514 Methodology: E.I.S., C.K.C., M.F.S.

515 Project administration: E.I.S., C.K.C., M.F.S.

516 Writing- original draft E.I.S, C.K.C., M.F.S.

517 Writing –reviewing and editing: A.E., CKC, E.I.S., J.M., J.W., M.F.S, S.C., Z.B.

518

## 519 **Competing interests**

520 Authors declare that they have no competing interests.

521

## 522 **Data and materials availability**

523 All data extracted from thermal images are available at <https://osf.io/fu2wx/>. The remaining  
524 data used support the findings of this study are available from the Western Cape Department of  
525 Agriculture in South Africa (WCDA). Restrictions apply to the use of some of these data, which  
526 are thus not publicly available. These data are however available from the WCDA  
527 upon reasonable request.

528

529 **Code availability**

530 Code for analyses is available on Github: [www.github.com/abumadsen/thermal-images-](https://www.github.com/abumadsen/thermal-images-ostrich/tree/main)  
531 [ostrich/tree/main](https://www.github.com/abumadsen/thermal-images-ostrich/tree/main)

532

533 **Supporting Information**

534 Tables S1-S16

535 Figures S1-S5

536

## 537 **References**

- 538 1. Angilletta, M. J. *Thermal adaptation: a theoretical and empirical synthesis*. (Oxford  
539 University Press, 2009).
- 540 2. Hurley, L. L., McDiarmid, C. S., Friesen, C. R., Griffith, S. C. & Rowe, M. Experimental  
541 heatwaves negatively impact sperm quality in the zebra finch. *Proc. R. Soc. B: Biol. Sci.*  
542 **285**, 20172547 (2018).
- 543 3. Walsh, B. S. *et al.* The impact of climate change on fertility. *Trends Ecol. Evol.* **34**, 249–  
544 259 (2019).
- 545 4. Schou, M. F. *et al.* Extreme temperatures compromise male and female fertility in a large  
546 desert bird. *Nat. Comm.* **12**, 666 (2021).
- 547 5. Sales, K. *et al.* Experimental heatwaves compromise sperm function and cause  
548 transgenerational damage in a model insect. *Nat. Comm.* **9**, 4771 (2018).
- 549 6. Huey, R. B., Hertz, P. E. & Sinervo, B. Behavioral drive versus behavioral inertia in  
550 evolution: a null model approach. *Am. Nat.* **161**, 357–366 (2003).
- 551 7. Sunday, J. M. *et al.* Thermal-safety margins and the necessity of thermoregulatory  
552 behavior across latitude and elevation. *Proc. Natl. Acad. Sci., USA* **111**, 5610–5615  
553 (2014).
- 554 8. Radchuk, V. *et al.* Adaptive responses of animals to climate change are most likely  
555 insufficient. *Nat. Comm.* **10**, 1–14 (2019).
- 556 9. Weissenböck, N. M., Weiss, C. M., Schwammer, H. M. & Kratochvil, H. Thermal  
557 windows on the body surface of African elephants (*Loxodonta africana*) studied by  
558 infrared thermography. *J. Therm. Biol.* **35**, 182–188 (2010).
- 559 10. Tattersall, G. J., Andrade, D. V. & Abe, A. S. Heat exchange from the Toucan bill reveals  
560 a controllable vascular thermal radiator. *Science* **325**, 468–470 (2009).



- 561 11. Symonds, M. R. E. & Tattersall, G. J. Geographical variation in bill size across bird  
562 species provides evidence for Allen's Rule. *Am. Nat.* **176**, 188–197 (2010).
- 563 12. Szafrńska, P. A., Andreasson, F., Nord, A. & Nilsson, J.-Å. Deep body and surface  
564 temperature responses to hot and cold environments in the zebra finch. *J. Therm. Biol.* **94**,  
565 102776 (2020).
- 566 13. McCafferty, D. J. *et al.* Estimating metabolic heat loss in birds and mammals by  
567 combining infrared thermography with biophysical modelling. *Comp. Biochem. Physiol.*  
568 *A: Mol. Int. Physiol.* **158**, 337–345 (2011).
- 569 14. Bourne, A. R., Cunningham, S. J., Spottiswoode, C. N. & Ridley, A. R. Hot droughts  
570 compromise interannual survival across all group sizes in a cooperatively breeding bird.  
571 *Ecol. Lett.* **23**, 1776–1788 (2020).
- 572 15. Hoffmann, A. A., Hallas, R. J., Dean, J. A. & Schiffer, M. Low potential for climatic  
573 stress adaptation in a rainforest *Drosophila* species. *Science* **301**, 100–102 (2003).
- 574 16. Kellermann, V., van Heerwaarden, B., Sgro, C. M. & Hoffmann, A. A. Fundamental  
575 evolutionary limits in ecological traits drive *Drosophila* species distributions. *Science*  
576 **325**, 1244–1246 (2009).
- 577 17. Kellermann, V. *et al.* Phylogenetic constraints in key functional traits behind species'  
578 climate niches: patterns of desiccation and cold resistance across 95 *Drosophila* species.  
579 *Evolution* **66**, 3377–3389 (2012).
- 580 18. Kellermann, V. *et al.* Upper thermal limits of *Drosophila* are linked to species  
581 distributions and strongly constrained phylogenetically. *Proc. Natl. Acad. Sci., USA* **109**,  
582 16228–16233 (2012).
- 583 19. Moreira, M. O., Qu, Y.-F. & Wiens, J. J. Large-scale evolution of body temperatures in  
584 land vertebrates. *Evol. Lett.* **5**, 484–494.

- 585 20. Williams, G. C. *Natural selection: Domains, levels and challenges*. (Oxford University  
586 Press, 1992).
- 587 21. Sinervo, B. *et al.* Erosion of lizard diversity by climate change and altered thermal niches.  
588 *Science* **328**, 894–899 (2010).
- 589 22. Wiens, J. J. Climate-related local extinctions are already widespread among plant and  
590 animal species. *PLoS Biol.* **14**, e2001104 (2016).
- 591 23. Parratt, S. R. *et al.* Temperatures that sterilize males better match global species  
592 distributions than lethal temperatures. *Nat. Clim. Chang.* **11**, 481–484 (2021).
- 593 24. Atwood, T. B. *et al.* Herbivores at the highest risk of extinction among mammals, birds,  
594 and reptiles. *Sci. Adv.* **6**, eabb8458 (2020).
- 595 25. Cardillo, M. *et al.* Multiple causes of high extinction risk in large mammal species.  
596 *Science* **309**, 1239–1241 (2005).
- 597 26. Bogert, C. M. Thermoregulation in reptiles, a factor in evolution. *Evolution* **3**, 195–211  
598 (1949).
- 599 27. Schou, M. F. *et al.* Evolutionary trade-offs between heat and cold tolerance limit  
600 responses to fluctuating climates.  
601 <https://www.biorxiv.org/content/10.1101/2021.10.20.463454v1> (2021)  
602 doi:10.1101/2021.10.20.463454.
- 603 28. Sauer, E. G. F. & Sauer, E. M. Sauer, E.G.F. and Sauer, E.M. (1966) The behavior and  
604 ecology of the South African Ostrich. *The Living Bird*, 5, 45-75. *The Living Bird* **5**, 45–  
605 75 (1966).
- 606 29. Darnell, M. Z. & Munguia, P. Thermoregulation as an alternate function of the sexually  
607 dimorphic fiddler crab claw. *Am. Nat.* **178**, 419–428 (2011).

- 608 30. Ryding, S., Klaassen, M., Tattersall, G. J., Gardner, J. L. & Symonds, M. R. E. Shape-  
609 shifting: changing animal morphologies as a response to climatic warming. *Trends. Ecol.*  
610 *Evol.* **36**, 1036–1048 (2021).
- 611 31. Svensson, E. I. & Waller, J. T. Ecology and sexual selection: evolution of wing  
612 pigmentation in calopterygid damselflies in relation to latitude, sexual dimorphism and  
613 speciation. *Am. Nat.* **182**, E174–E195 (2013).
- 614 32. Moore, M. P. *et al.* Sex-specific ornament evolution is a consistent feature of climatic  
615 adaptation across space and time in dragonflies. *Proc. Natl. Acad. Sci., USA* **118**, (2021).
- 616 33. Rogalla, S., Patil, A., Dhinojwala, A., Shawkey, M. D. & D’Alba, L. Enhanced  
617 photothermal absorption in iridescent feathers. *Interface Sci.* **18**, 20210252 (2021).
- 618 34. Svensson, E. I., Gomez-Llano, M. A. & Waller, J. T. Selection on phenotypic plasticity  
619 favors thermal canalization. *Proc. Natl. Acad. Sci., USA* **117**, 29767–29774 (2020).
- 620 35. Ghalambor, C. K. *et al.* Non-adaptive plasticity potentiates rapid adaptive evolution of  
621 gene expression in nature. *Nature* **525**, 372–375 (2015).
- 622 36. Radersma, R., Noble, D. W. A. & Uller, T. Plasticity leaves a phenotypic signature during  
623 local adaptation. *Evol. Lett.* **4**, 360–370 (2020).
- 624 37. Stamp, M. A. & Hadfield, J. D. The relative importance of plasticity versus genetic  
625 differentiation in explaining between population differences; a meta-analysis. *Ecol. Lett.*  
626 **23**, 1432–144.
- 627 38. Campbell-Staton, S. C., Velotta, J. P. & Winchell, K. M. Selection on adaptive and  
628 maladaptive gene expression plasticity during thermal adaptation to urban heat islands.  
629 *Nat. Comm.* **12**, 6195 (2021).
- 630 39. Nilsson, J.-Å., Molokwu, M. N. & Olsson, O. Body temperature regulation in hot  
631 environments. *PLoS One* **11**, e0161481 (2016).

- 632 40. Stillman, J. H. Acclimation capacity underlies susceptibility to climate change. *Science*  
633 **301**, 65–65 (2003).
- 634 41. Calosi, P., Bilton, D. T. & Spicer, J. I. Thermal tolerance, acclimatory capacity and  
635 vulnerability to global climate change. *Biol. Lett.* **4**, 99–102 (2008).
- 636 42. Gunderson, A. R. & Stillman, J. H. Plasticity in thermal tolerance has limited potential to  
637 buffer ectotherms from global warming. *Proc. Biol. Sci.* **282**, 20150401 (2015).
- 638 43. Schou, M. F., Mouridsen, M. B., Sørensen, J. G. & Loeschcke, V. Linear reaction norms  
639 of thermal limits in *Drosophila*: predictable plasticity in cold but not in heat tolerance.  
640 *Funct. Ecol.* **31**, 934–945 (2017).
- 641 44. Gould, S. J. & Vrba, E. S. Exaptation - a missing term in the science of form.  
642 *Paleobiology* **8**, 4–15 (1982).
- 643 45. Reeve, H. K. & Sherman, P. W. Adaptations and the goals of evolutionary research. *Q.*  
644 *Rev. Biol.* **68**, 1–32 (1993).
- 645 46. Simmons, R. E. & Scheepers, L. Winning by a neck: sexual selection in the evolution of  
646 giraffe. *Am. Nat.* **148**, 771–786 (1996).
- 647 47. Bertram, B. C. R. *The Ostrich Communal Nesting System*. (Princeton University Press,  
648 NJ, 1992).
- 649 48. Lack, D. *The natural regulation of animal numbers*. (Clarendon, 1954).
- 650 49. Williams, G. C. Natural selection, the costs of reproduction, and a refinement of Lack's  
651 principle. *Am. Nat.* **100**, 687–690 (1966).
- 652 50. Tattersall, G. J. & Cadena, V. Insights into animal temperature adaptations revealed  
653 through thermal imaging. *Imaging Sci. J.* **58**, 261–268 (2010).
- 654 51. Riddell, E. A., Iknayan, K. J., Wolf, B. O., Sinervo, B. & Beissinger, S. R. Cooling  
655 requirements fueled the collapse of a desert bird community from climate change. *Proc.*  
656 *Natl. Acad. Sci., USA* **116**, 21609–21615 (2019).

- 657 52. Cloete, S. W. P., Engelbrecht, A., Olivier, J. J. & Bunter, K. L. Deriving a preliminary  
658 breeding objective for commercial ostriches: an overview. *Aust. J. Exp. Agric.* **48**, 1247–  
659 1256 (2008).
- 660 53. Wood, S. N. Stable and efficient multiple smoothing parameter estimation for generalized  
661 additive models. *J. Am. Stat. Assoc.* **99**, 673–686 (2004).
- 662 54. Schou, M. F. *et al.* Extreme temperatures compromise male and female fertility in a large  
663 desert bird. *Nat. Comm.* **12**, 666 (2021).
- 664 55. R Core Team. *R: A language and environment for statistical computing*. (R foundation for  
665 statistical computing, 2020).
- 666 56. Hadfield, J. D. MCMC Methods for Multi-Response Generalized Linear Mixed Models:  
667 The **MCMCglmm** R Package. *J. Stat. Soft.* **33**, 1–22 (2010).
- 668 57. Maloney, S. K. Thermoregulation in ratites: a review. *Aust. J. Exp. Agric.* **48**, 1293  
669 (2008).
- 670 58. Houle, D. Comparing evolvability and variability of quantitative traits. *Genetics* **130**,  
671 195–204 (1992).
- 672 59. Fick, S. E. & Hijmans, R. J. WorldClim 2: new 1-km spatial resolution climate surfaces  
673 for global land areas. *Int. J. Climatol* **37**, 4302–4315 (2017).
- 674

675 **Figures and captions**

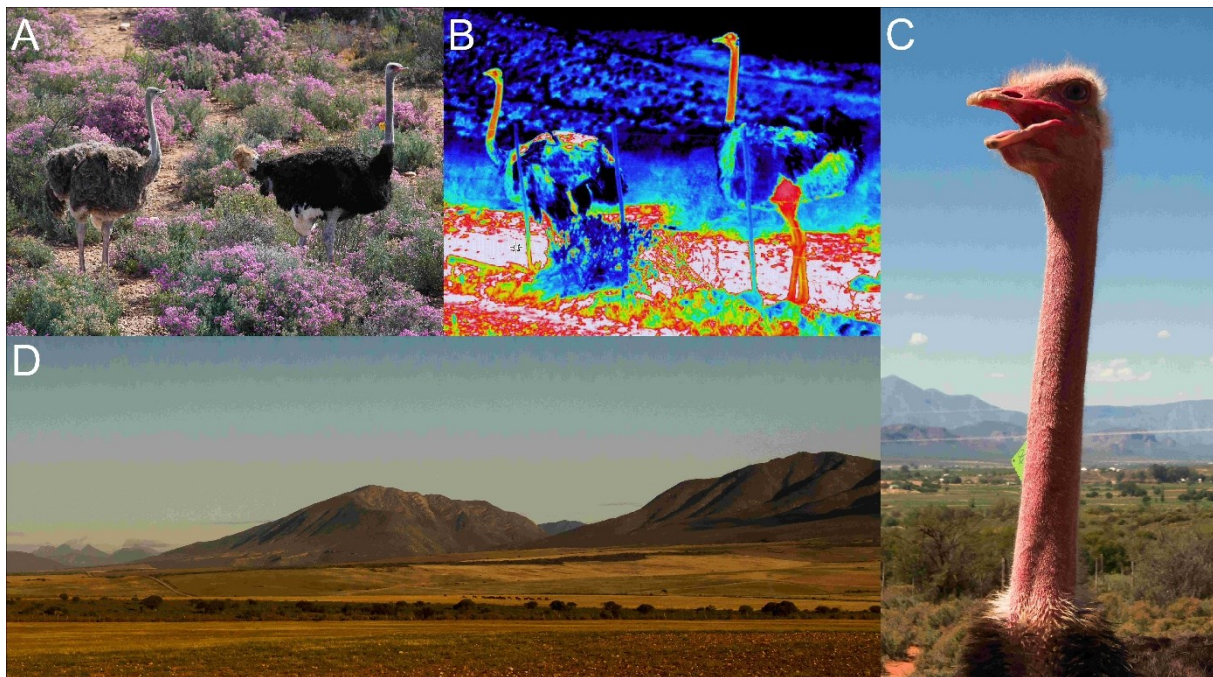

676

677 **Fig. 1. Thermoregulation in the world's largest living bird in the Karoo desert environment in South Africa.**

678 **A.** The ostrich (*Struthio camelus*) is the world's largest living bird with a feathered body and featherless neck and  
679 head. *Left:* female. *Right:* male (photograph by C. K. Cornwallis in Karoo National Park, Western Cape Province  
680 of South Africa). **B.** Thermal image of a female (left) and male (right) ostrich in our study population at Oudtshoorn  
681 (photograph by E. I. Svensson). Note how the long neck is hot and emits excess heat (red, warm colour). **C.** Close-  
682 up photo of a male ostrich of East African origin ("Kenyan Red"; KR) from our individually-marked study  
683 population in Oudtshoorn during the heat of the day (photograph by E. I. Svensson). The open bill is due to panting  
684 behaviour that gets rid of excess heat when ambient temperatures are high. **D.** The dry and tree-less semi-desert  
685 environment around the study site is characterized by extensive temperature fluctuations ranging from  $-5^{\circ}\text{C}$  to  
686  $45^{\circ}\text{C}$ , causing extreme thermal stress<sup>4</sup> (photograph by E. I. Svensson).

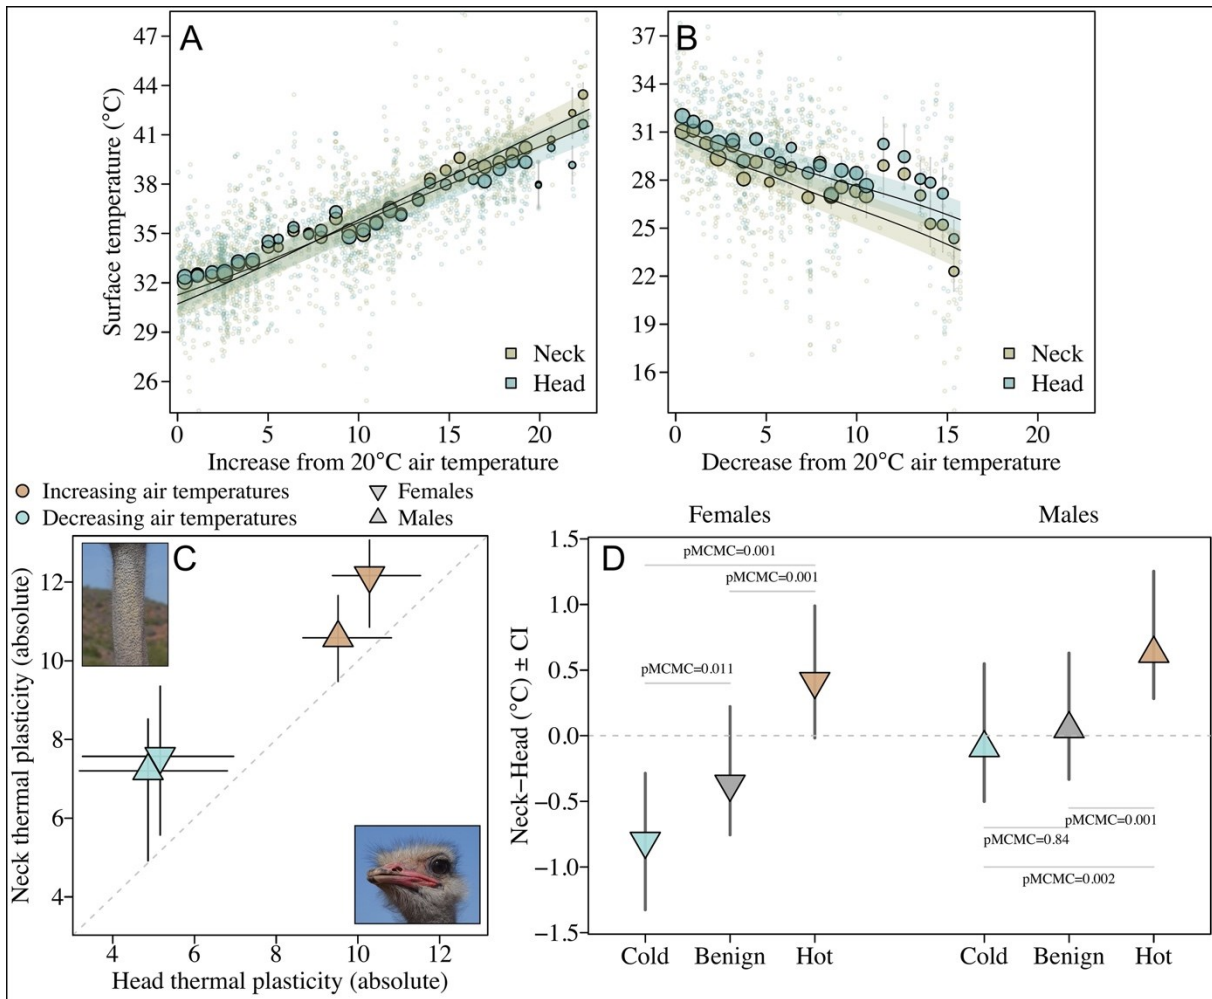

687

688 **Fig. 2. The ostrich neck acts as a thermal radiator regulating head temperature. (A-B)** The surface  
 689 temperatures of the head and neck were sensitive to increases ( $n_{\text{images}} = 3848$ ) and decreases ( $n_{\text{images}} = 1683$ ) in air  
 690 temperatures (Tables S1-S2). Only females are shown with five extreme datapoints in A removed for graphical  
 691 purposes (see Fig. S3 which shows very similar patterns for males). **(C)** The rate of surface temperature change  
 692 was steeper for the neck compared to the head (Table S3). This difference in thermal plasticity between the two  
 693 body parts was consistent across both decreasing and increasing temperatures, and in both males ( $n_{\text{individuals}} = 371$ )  
 694 and females ( $n_{\text{individuals}} = 423$ ). **(D)** The difference in thermal plasticity between the head and neck led to higher  
 695 discrepancy between neck to head surface temperatures during hot ambient conditions (air temperatures  $\geq 30^{\circ}\text{C}$ ,  
 696  $n_{\text{images}} = 1696$ ) and cold (air temperatures  $\leq 20^{\circ}\text{C}$ ,  $n_{\text{images}} = 1683$ ) but not under benign (air temperatures  $> 20^{\circ}\text{C}$   
 697  $\& < 30^{\circ}\text{C}$ ,  $n_{\text{images}} = 2152$ ) ambient conditions (Table S6).

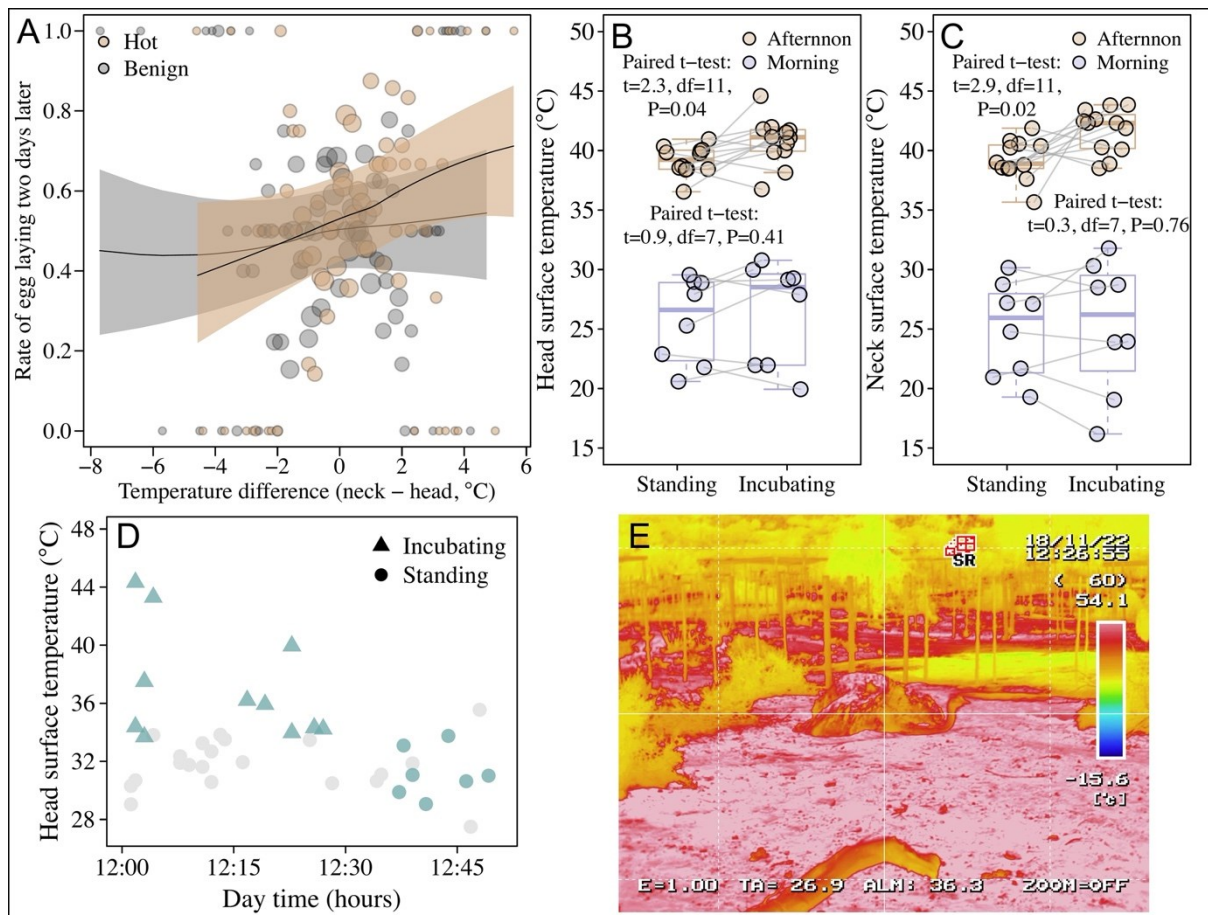

698

699 **Fig 3: The reproductive benefits of the neck as a thermal radiator. (A)** A high temperature difference between  
 700 neck and head is associated with a higher egg-laying rate two days later during hot temperatures (air temperatures  
 701  $\geq 30^{\circ}\text{C}$ ,  $n_{\text{images}} = 471$ ,  $n_{\text{females}} = 228$ ), but not at benign temperatures (air temperatures =  $20\text{--}30^{\circ}\text{C}$ ,  $n_{\text{images}} = 615$ ,  
 702  $n_{\text{females}} = 220$ ) (Tables S7). **(B-C)** During hot afternoons incubating females have significantly higher head and  
 703 neck temperatures than standing females, revealing high thermal costs of incubation that were not evident during  
 704 colder mornings. **(D)** A female ostrich was monitored during incubation under natural conditions. Her head  
 705 temperatures were elevated compared to other standing individuals ( $n_{\text{individuals}} = 21$ ). When she halted incubation  
 706 and moved to the shade of a tree, her head temperature quickly dropped, becoming similar to those of other  
 707 standing individuals. **(E)** Thermal image of the incubating female in the sun (warmer colours indicate higher  
 708 temperatures). These findings are consistent with the dissipation of heat through the neck having reproductive  
 709 benefits for females.

710



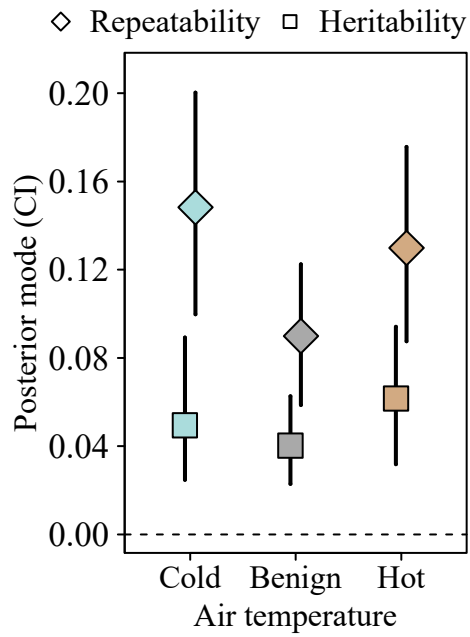

711

712 **Fig. 4. Evolutionary potential of thermal radiator efficiency.** The efficiency of the neck in regulating head  
713 temperatures was measured as the difference between neck and head temperatures for each individual.  
714 Repeatability and heritability were estimated at different air temperatures (cold < 20°C, benign = 20-30°C and hot  
715 >= 30°C) and were generally low, but significantly different from zero (Table S8). Note that the low repeatabilities  
716 may result in an underestimation of our heritability measures.

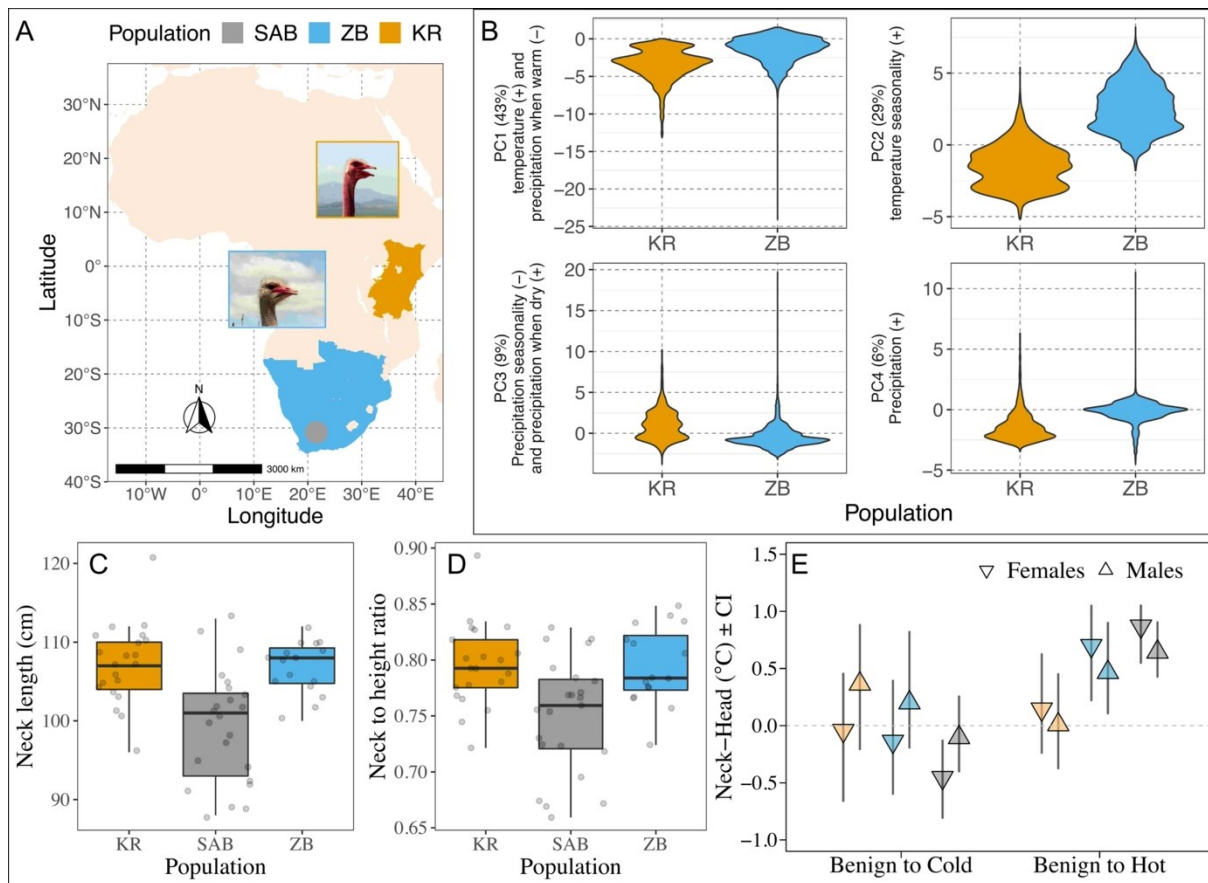

717

718 **Fig. 5. Ostrich populations originating from more variable climatic regions exhibit greater thermal**

719 **plasticity. (A-B)** Kenyan Reds (KR) inhabit eastern Africa that is less seasonal and has lower temperature

720 fluctuations compared to Southern Africa, where Zimbabwean Blues (ZB) and South African Blacks (SAB) occur.

721 Distribution ranges were estimated from regional presence/absence data from Avibase (<https://avibase.bsc->

722 [eoc.org](https://avibase.bsc-eoc.org)) and climatic data was obtained from WorldClim<sup>59</sup> (Table S14). **(C-D)** These three populations also differ

723 significantly in morphology: SAB ( $n_{\text{individuals}} = 23$ ) have shorter necks and lower neck to height ratio than KR

724 ( $n_{\text{individuals}} = 21$ ) and ZB ( $n_{\text{individuals}} = 16$ ) (Tables S12-S13). **(E)** For both the SAB ( $n_{\text{individuals}} = 556$ ) and ZB ( $n_{\text{individuals}}$

725  $= 71$ ) populations the neck-head temperature difference increased from benign to hot temperatures, but this was

726 not the case for KR ( $n_{\text{individuals}} = 55$ ) (Tables S6).
